# Supplementary material for: Multilocus Variable Number of Tandem Repeat Analysis Reveals Multiple Introductions in Spain of Xanthomonas arboricola pv. pruni, the Causal Agent of Bacterial Spot Disease of Stone Fruits and Almond
Source: PubMed Central journal article supplement (PMC5036818; doi:10.1371/journal.pone.0163729), 2016-09-26
Supplement: pone.0163729.s001.pdf [file pone.0163729.s001.pdf]

### TR19I

GATTGACGGCACCCACACAG CGTGCCACCTTT CGATTCC CGATTCC CGATTCC CGATTCC  
CCAATCC TCAATCC TCAATCC TCAATCC TCAATCC TCAATCC TCAATCC  
CCACCACGCATGC ACCACGGCACAACGTCCTGG

### TR54I

CTGCATCGGCCTGATCGTGG CCGGGGTGATCGGGCTGAAGCTGGTGGGGTAGT  
CGTGGTCAGCCCTG CGTGATCAGCCCTG CGTGGTCAGCCC  
CACTGCGTGGGCCTGCCTCCCAAGATTGCTATGCAAACCTTGGGCCCCACTTCGTAGCAGC  
CTATCCCCCGCCTTCGGCGCGCCCCCTTAACAGAAGGGGGCTCTGCTCCAG  
TGGGGTGTGCGAGGTGTGGGGCATAGTTTGCTAGGC GCCGCCA GCCGCCA GCCGCCA  
GCCGCCAATCC CCAATCC CCAATCC CCAATCC CCAATCC CCAATCC CCA CCGGCT  
ACAGCCGGTACGCCACCGCTTT

### TR05II/TR06II

GTGCAGCACCAGCCAAAGGCAGTTGCATCAGACCCAGCGCCGCAGATGCTGTCCCGAT  
TCCCGAT TCCCGAT TCCCGAT TCCCGAT TCCCGAT TCCCGAT TCCCGAT TCCCGAT  
TCCCAAT CCCCGAT TCCCAAT CCCCAAT CCCCAAT CCCCAAT CCCCAAT CCCCAAT  
CCCCAAT CCCCA GCCTATGACCTTCCGCGAACCCGTCGAC

### TR67II

AGCTCGCAACTGCTT TTCCCGA TTCCCGA TTCCCGA TTCCCGA TTCCCGA TTCCCGA  
TTCCCGA TTCCCGA TTCCCGA TTCCCGA ATCCCGA TTCCCGA TTCC  
AGCCCCAATATGCGAAACTTCCACGATGACAATCGTTCTCATCGCGTTCGCCTTGTATC

### TR18II

CCGGCATT TTTT GGAATCG GGAATCG GGAATCG GGAATCG GGAATCG GGAATCG  
GGAATC GGAATCG GGAATCG GAGAGGCG GGAATCG GAGAGGCG  
GGAATCGCAGAAGCGGGGTGTCGCTCTTGTCTACCTATCCCCATTCCAATTCCCGATTCC  
CAGCCCTCAAAGCATCCGGCTGATCGTGAA

**FIG S1** Nucleotide sequence in *Xanthomonas arboricola* pv. pruni strain CFBP 3894 of TR loci developed by Cesbron et al. [33] that were excluded from the analysis (TR19I and TR54I) or for which new primer combinations were designed (other loci).

Color blocks indicate TRs differing in nucleotide sequence. Underlined regions correspond to primers designed by Cesbron et al. [33]. For TR05II and TR06II, the bold and italicized regions correspond to TR05II and TR06II, respectively. Plain and dashed underlined regions correspond to primers designed by Cesbron et al. [33] for TR05II and TR06II, respectively.
