# Supplementary material for: Multilocus Variable Number of Tandem Repeat Analysis Reveals Multiple Introductions in Spain of Xanthomonas arboricola pv. pruni, the Causal Agent of Bacterial Spot Disease of Stone Fruits and Almond
Source: PubMed Central journal article supplement (PMC5036818; doi:10.1371/journal.pone.0163729), 2016-09-26
Supplement: pone.0163729.s002.pdf [file pone.0163729.s002.pdf]

S1 Table. *Xanthomonas arboricola* pv. *pruni* strains isolated from 11 provinces in Spain.

| Strain <sup>a</sup>        | Province | Host of isolation | Cultivar | Year of isolation | Origin  | Haplotype number | Genetic cluster (GC) |
|----------------------------|----------|-------------------|----------|-------------------|---------|------------------|----------------------|
| IVIA 3161.2-1 <sup>b</sup> | Alicante | Almond            | Rumbeta  | 2006              | Orchard | 5                | 4                    |
| IVIA 3161.2-2              | Alicante | Almond            | Rumbeta  | 2006              | Orchard | 5                | 4                    |
| IVIA 3161.4                | Alicante | Almond            | Rumbeta  | 2006              | Orchard | 5                | 4                    |
| IVIA 3162.1 <sup>c</sup>   | Alicante | Almond            | Rumbeta  | 2006              | Orchard | 46               | 4                    |
| IVIA 3162.2                | Alicante | Almond            | Rumbeta  | 2006              | Orchard | 7                | 4                    |
| IVIA 3162.3                | Alicante | Almond            | Rumbeta  | 2006              | Orchard | 7                | 4                    |
| IVIA 3162.4-5              | Alicante | Almond            | Rumbeta  | 2006              | Orchard | 5                | 4                    |
| IVIA 3162.4-6              | Alicante | Almond            | Rumbeta  | 2006              | Orchard | 7                | 4                    |
| IVIA 3177.1-1-1            | Alicante | Almond            | Rumbeta  | 2006              | Orchard | 5                | 4                    |
| IVIA 3177.1-6-2            | Alicante | Almond            | Rumbeta  | 2006              | Orchard | 5                | 4                    |
| IVIA 3177.3-4-3            | Alicante | Almond            | Rumbeta  | 2006              | Orchard | 40               | 4                    |
| IVIA 3177.3-8-4            | Alicante | Almond            | Rumbeta  | 2006              | Orchard | 48               | 4                    |
| IVIA 3177.3-10-5           | Alicante | Almond            | Rumbeta  | 2006              | Orchard | 5                | 4                    |
| IVIA 3181.3-1-6            | Alicante | Almond            | Rumbeta  | 2006              | Orchard | 47               | 4                    |
| IVIA 3181.3-1-7            | Alicante | Almond            | Rumbeta  | 2006              | Orchard | 6                | 4                    |

|                          |          |               |         |      |         |    |   |
|--------------------------|----------|---------------|---------|------|---------|----|---|
| IVIA 3181.3-1-8          | Alicante | Almond        | Rumbeta | 2006 | Orchard | 6  | 4 |
| IVIA 3181.3-3-1          | Alicante | Almond        | Rumbeta | 2006 | Orchard | 4  | 4 |
| IVIA 3181.3-3-2          | Alicante | Almond        | Rumbeta | 2006 | Orchard | 4  | 4 |
| IVIA 3181.3-3-3          | Alicante | Almond        | Rumbeta | 2006 | Orchard | 4  | 4 |
| IVIA 3181.3-3-4          | Alicante | Almond        | Rumbeta | 2006 | Orchard | 4  | 4 |
| IVIA 3181.3-3-5          | Alicante | Almond        | Rumbeta | 2006 | Orchard | 4  | 4 |
| IVIA 3181.3-3-6          | Alicante | Almond        | Rumbeta | 2006 | Orchard | 4  | 4 |
| IVIA 2626.1 <sup>c</sup> | Badajoz  | Japanese plum | Fortune | 2002 | Orchard | 2  | 6 |
| IVIA 2626.2              | Badajoz  | Japanese plum | Fortune | 2002 | Orchard | 2  | 6 |
| IVIA 2626.3              | Badajoz  | Japanese plum | Fortune | 2002 | Orchard | 13 | 1 |
| IVIA 2626.4              | Badajoz  | Japanese plum | Fortune | 2002 | Orchard | 64 | 1 |
| IVIA 2626.5              | Badajoz  | Japanese plum | Fortune | 2002 | Orchard | 2  | 6 |
| IVIA 2626.6 <sup>b</sup> | Badajoz  | Japanese plum | Fortune | 2002 | Orchard | 14 | 1 |
| IVIA 2626.7              | Badajoz  | Japanese plum | Fortune | 2002 | Orchard | 13 | 1 |
| IVIA 2626.8a             | Badajoz  | Japanese plum | Fortune | 2002 | Orchard | 43 | 6 |
| IVIA 2626.8b             | Badajoz  | Japanese plum | Fortune | 2002 | Orchard | 50 | 6 |
| IVIA 2626.10             | Badajoz  | Japanese plum | Fortune | 2002 | Orchard | 14 | 1 |

|                 |         |               |           |      |         |    |   |
|-----------------|---------|---------------|-----------|------|---------|----|---|
| IVIA 2647.1-2   | Badajoz | Japanese plum | Larry Ann | 2002 | Nursery | 44 | 6 |
| IVIA 2647.1-3   | Badajoz | Japanese plum | Larry Ann | 2002 | Nursery | 2  | 6 |
| IVIA 2647.1-6   | Badajoz | Japanese plum | Larry Ann | 2002 | Nursery | 2  | 6 |
| IVIA 2647.1-7   | Badajoz | Japanese plum | Larry Ann | 2002 | Nursery | 2  | 6 |
| IVIA 2647.1-8   | Badajoz | Japanese plum | Larry Ann | 2002 | Nursery | 1  | 6 |
| IVIA 2647.1-9   | Badajoz | Japanese plum | Larry Ann | 2002 | Nursery | 1  | 6 |
| IVIA 2647.1-10  | Badajoz | Japanese plum | Larry Ann | 2002 | Nursery | 2  | 6 |
| IVIA 2647.1-12a | Badajoz | Japanese plum | Larry Ann | 2002 | Nursery | 2  | 6 |
| IVIA 2647.1-12b | Badajoz | Japanese plum | Larry Ann | 2002 | Nursery | 2  | 6 |
| IVIA 2647.1-13  | Badajoz | Japanese plum | Larry Ann | 2002 | Nursery | 2  | 6 |
| IVIA 2647.1-14  | Badajoz | Japanese plum | Larry Ann | 2002 | Nursery | 2  | 6 |
| IVIA 2647.1-15  | Badajoz | Japanese plum | Larry Ann | 2002 | Nursery | 2  | 6 |
| IVIA 2647.3-1   | Badajoz | Japanese plum | Friar     | 2002 | Nursery | 13 | 1 |
| IVIA 2647.3-2   | Badajoz | Japanese plum | Friar     | 2002 | Nursery | 13 | 1 |
| IVIA 2649.1     | Badajoz | Japanese plum | Friar     | 2002 | Orchard | 16 | 9 |
| IVIA 2649.2     | Badajoz | Japanese plum | Friar     | 2002 | Orchard | 66 | 9 |
| IVIA 2649.3     | Badajoz | Japanese plum | Friar     | 2002 | Orchard | 16 | 9 |

|               |         |               |           |      |         |    |    |
|---------------|---------|---------------|-----------|------|---------|----|----|
| IV IA 2649.4  | Badajoz | Japanese plum | Friar     | 2002 | Orchard | 16 | 9  |
| IVIA 2649.7   | Badajoz | Japanese plum | Friar     | 2002 | Orchard | 68 | 9  |
| IVIA 2649.10  | Badajoz | Japanese plum | Friar     | 2002 | Orchard | 16 | 9  |
| IVIA 2667     | Badajoz | Japanese plum | Friar     | 2002 | Orchard | 3  | 12 |
| IVIA 2758.1   | Badajoz | Japanese plum |           | 2003 | Orchard | 9  | 10 |
| IVIA 2758.2   | Badajoz | Japanese plum |           | 2003 | Orchard | 52 | 10 |
| IVIA 2758.3   | Badajoz | Japanese plum |           | 2003 | Orchard | 9  | 10 |
| IVIA 2795     | Badajoz | Japanese plum | Larry Ann | 2003 | Orchard | 53 | 10 |
| IVIA 3355.1   | Badajoz | Japanese plum | Larry Ann | 2007 | Orchard | 3  | 12 |
| IVIA 3355.2   | Badajoz | Japanese plum | Larry Ann | 2007 | Orchard | 45 | 12 |
| IVIA 3373.1a  | Badajoz | Japanese plum | Friar     | 2007 | Orchard | 18 | 9  |
| IVIA 3373.1b  | Badajoz | Japanese plum | Friar     | 2007 | Orchard | 18 | 9  |
| IVIA 3373.2a  | Badajoz | Japanese plum | Friar     | 2007 | Orchard | 18 | 9  |
| IVIA 3373.2b  | Badajoz | Japanese plum | Friar     | 2007 | Orchard | 18 | 9  |
| IVIA 3374a    | Badajoz | Japanese plum | Angeleno  | 2007 | Orchard | 18 | 9  |
| IVIA 3374b    | Badajoz | Japanese plum | Angeleno  | 2007 | Orchard | 18 | 9  |
| IVIA 3378.2-2 | Badajoz | Nectarine     | Zeeglo    | 2007 | Orchard | 18 | 9  |

|              |         |               |             |      |         |    |    |
|--------------|---------|---------------|-------------|------|---------|----|----|
| IVIA 3378.3  | Badajoz | Nectarine     | Zeeglo      | 2007 | Orchard | 18 | 9  |
| IVIA 3437.5  | Badajoz | Japanese plum |             | 2008 | Orchard | 11 | 5  |
| IVIA 3437.6  | Badajoz | Japanese plum |             | 2008 | Orchard | 10 | 5  |
| IVIA 3437.7  | Badajoz | Japanese plum |             | 2008 | Orchard | 10 | 5  |
| IVIA 3438.8  | Badajoz | Japanese plum |             | 2008 | Orchard | 11 | 5  |
| IVIA 3438.10 | Badajoz | Japanese plum |             | 2008 | Orchard | 11 | 5  |
| IVIA 3439.1  | Badajoz | Japanese plum |             | 2008 | Orchard | 11 | 5  |
| IVIA 3439.3  | Badajoz | Japanese plum |             | 2008 | Orchard | 56 | 5  |
| IVIA 3439.5  | Badajoz | Japanese plum |             | 2008 | Orchard | 11 | 5  |
| IVIA 3439.7  | Badajoz | Japanese plum |             | 2008 | Orchard | 57 | 5  |
| IVIA 3439.8  | Badajoz | Japanese plum |             | 2008 | Orchard | 54 | 5  |
| IVIA 3741    | Badajoz | Japanese plum | Larry Ann   | 2010 | Orchard | 62 | 5  |
| IVIA 3742    | Badajoz | Japanese plum | Golden Plum | 2010 | Orchard | 61 | 5  |
| IVIA 4266.1  | Huelva  | Japanese plum | Black Late  | 2012 | Orchard | 35 | 11 |
| IVIA 4266.2  | Huelva  | Japanese plum | Black Late  | 2012 | Orchard | 35 | 11 |
| IVIA 4266.7  | Huelva  | Japanese plum | Black Late  | 2012 | Orchard | 34 | 11 |
| IVIA 4266.9  | Huelva  | Japanese plum | Black Late  | 2012 | Orchard | 34 | 11 |

|               |        |               |            |      |         |     |    |
|---------------|--------|---------------|------------|------|---------|-----|----|
| IVIA 4286.1-1 | Huelva | Japanese plum | Black Late | 2012 | Orchard | 49  | 14 |
| IVIA 4286.2-2 | Huelva | Japanese plum | Black Late | 2012 | Orchard | 34  | 11 |
| IVIA 3487.1   | Huesca | Apricot       |            | 2008 | Orchard | 72  | 3  |
| IVIA 3487.3   | Huesca | Apricot       |            | 2008 | Orchard | 22  | 3  |
| IVIA 3487.4   | Huesca | Apricot       |            | 2008 | Orchard | 21  | 3  |
| IVIA 3489.2   | Huesca | Japanese plum |            | 2008 | Orchard | 71  | 3  |
| IVIA 3489.4   | Huesca | Japanese plum |            | 2008 | Orchard | 21  | 3  |
| IVIA 3490.1   | Huesca | Japanese plum |            | 2008 | Orchard | 20  | 3  |
| IVIA 3490.2   | Huesca | Japanese plum |            | 2008 | Orchard | 20  | 3  |
| IVIA 3490.3   | Huesca | Japanese plum |            | 2008 | Orchard | 21  | 3  |
| IVIA 3490.4   | Huesca | Japanese plum |            | 2008 | Orchard | 73  | 3  |
| IVIA 3491.7   | Huesca | Japanese plum |            | 2008 | Orchard | 70  | 3  |
| IVIA 3491.8   | Huesca | Japanese plum |            | 2008 | Orchard | 69  | 3  |
| IVIA 3492.2   | Huesca | Japanese plum |            | 2008 | Orchard | 19  | 3  |
| IVIA 3492.3   | Huesca | Japanese plum |            | 2008 | Orchard | 19  | 3  |
| IVIA 3604.2   | Huesca | Almond        |            | 2009 | Orchard | 114 | 2  |
| IVIA 3604.7   | Huesca | Almond        |            | 2009 | Orchard | 12  | 1  |

|              |        |        |       |      |         |     |   |
|--------------|--------|--------|-------|------|---------|-----|---|
| IVIA 3604.10 | Huesca | Almond |       | 2009 | Orchard | 107 | 2 |
| IVIA 3604.12 | Huesca | Almond |       | 2009 | Orchard | 108 | 2 |
| IVIA 4165.15 | Huesca | Almond | Guara | 2011 | Orchard | 32  | 1 |
| IVIA 4165.21 | Huesca | Almond | Guara | 2011 | Orchard | 113 | 2 |
| IVIA 4166.12 | Huesca | Almond | Guara | 2011 | Orchard | 29  | 1 |
| IVIA 4166.28 | Huesca | Almond | Guara | 2011 | Orchard | 92  | 1 |
| IVIA 4491.1  | Huesca | Almond |       | 2013 | Orchard | 116 | 2 |
| IVIA 4491.2  | Huesca | Almond |       | 2013 | Orchard | 117 | 2 |
| IVIA 4491.3  | Huesca | Almond |       | 2013 | Orchard | 110 | 2 |
| IVIA 4492.1  | Huesca | Almond |       | 2013 | Orchard | 111 | 2 |
| IVIA 4492.2  | Huesca | Almond |       | 2013 | Orchard | 112 | 2 |
| IVIA 4492.3  | Huesca | Almond |       | 2013 | Orchard | 118 | 2 |
| IVIA 4492.4  | Huesca | Almond |       | 2013 | Orchard | 119 | 2 |
| IVIA 4493    | Huesca | Almond |       | 2013 | Orchard | 25  | 1 |
| CITA 21      | Huesca | Almond |       | 2008 | Orchard | 22  | 3 |
| CITA 38      | Huesca | Almond |       | 2009 | Orchard | 12  | 1 |
| CITA 56      | Huesca | Almond |       | 2010 | Orchard | 12  | 1 |

|                          |          |               |           |      |         |     |    |
|--------------------------|----------|---------------|-----------|------|---------|-----|----|
| CITA 63                  | Huesca   | Almond        | Guara     | 2010 | Orchard | 115 | 2  |
| CITA 116                 | Huesca   | Almond        |           | 2011 | Orchard | 105 | 2  |
| CITA 145                 | Huesca   | Almond        |           | 2012 | Nursery | 41  | 13 |
| CITA 148                 | Huesca   | Almond        | Guara     | 2012 | Orchard | 82  | 1  |
| CITA 170                 | Huesca   | Almond        | Vayro     | 2013 | Orchard | 51  | 18 |
| CITA 173                 | Huesca   | Almond        | Vayro     | 2013 | Orchard | 25  | 1  |
| IVIA 3479.1              | Lleida   | Peach         | Ryan Sun  | 2008 | Orchard | 81  | 1  |
| CITA 91                  | Lleida   | Peach         |           | 2011 | Nursery | 88  | 16 |
| CITA 143                 | Lleida   | Almond        |           | 2012 | Orchard | 29  | 1  |
| IVIA 3704.2 <sup>c</sup> | Mallorca | Japanese plum | Larry Ann | 2010 | Orchard | 31  | 1  |
| IVIA 3704.3              | Mallorca | Japanese plum | Larry Ann | 2010 | Orchard | 31  | 1  |
| IVIA 3704.5              | Mallorca | Japanese plum | Larry Ann | 2010 | Orchard | 31  | 1  |
| IVIA 3704.6              | Mallorca | Japanese plum | Larry Ann | 2010 | Orchard | 31  | 1  |
| IVIA 3704.7              | Mallorca | Japanese plum | Larry Ann | 2010 | Orchard | 31  | 1  |
| IVIA 3704.8              | Mallorca | Japanese plum | Larry Ann | 2010 | Orchard | 31  | 1  |
| IVIA 3704.9              | Mallorca | Japanese plum | Larry Ann | 2010 | Orchard | 30  | 1  |
| IVIA 3704.10             | Mallorca | Japanese plum | Larry Ann | 2010 | Orchard | 31  | 1  |



|                        |           |               |           |      |         |     |   |
|------------------------|-----------|---------------|-----------|------|---------|-----|---|
| IVIA 3704.11           | Mallorca  | Japanese plum | Larry Ann | 2010 | Orchard | 30  | 1 |
| IVIA 3704.12           | Mallorca  | Japanese plum | Larry Ann | 2010 | Orchard | 31  | 1 |
| IVIA 3705.6            | Mallorca  | Japanese plum | Fortune   | 2010 | Orchard | 31  | 1 |
| IVIA 3705.7            | Mallorca  | Japanese plum | Fortune   | 2010 | Orchard | 31  | 1 |
| CITA 53                | Navarra   | Almond        | Guara     | 2009 | Orchard | 100 | 1 |
| CITA 77                | Navarra   | Almond        | Guara     | 2010 | Orchard | 59  | 7 |
| IVIA 4113 <sup>c</sup> | Tarragona | Almond        | Guara     | 2011 | Orchard | 78  | 1 |
| IVIA 4330 <sup>c</sup> | Teruel    | Almond        | Guara     | 2009 | Orchard | 93  | 1 |
| IVIA 4490.1            | Teruel    | Almond        |           | 2013 | Orchard | 15  | 1 |
| IVIA 4490.2            | Teruel    | Almond        |           | 2013 | Orchard | 15  | 1 |
| IVIA 4494.1            | Teruel    | Apricot       |           | 2013 | Orchard | 36  | 1 |
| IVIA 4494.2            | Teruel    | Apricot       |           | 2013 | Orchard | 36  | 1 |
| IVIA 4523.1            | Teruel    | Peach         | Royal Lee | 2013 | Orchard | 65  | 1 |
| IVIA 4523.2            | Teruel    | Peach         | Royal Lee | 2013 | Orchard | 36  | 1 |
| IVIA 4523.3            | Teruel    | Peach         | Royal Lee | 2013 | Orchard | 102 | 1 |
| IVIA 4524.1            | Teruel    | Peach         | Royal Lee | 2013 | Orchard | 96  | 1 |
| IVIA 4524.2            | Teruel    | Peach         | Royal Lee | 2013 | Orchard | 87  | 1 |

|                          |          |               |           |      |         |    |   |
|--------------------------|----------|---------------|-----------|------|---------|----|---|
| IVIA 4524.3              | Teruel   | Peach         | Royal Lee | 2013 | Orchard | 37 | 1 |
| IVIA 4524.4              | Teruel   | Peach         | Royal Lee | 2013 | Orchard | 85 | 1 |
| IVIA 4524.5              | Teruel   | Peach         | Royal Lee | 2013 | Orchard | 36 | 1 |
| CITA 34                  | Teruel   | Almond        | Guara     | 2009 | Orchard | 26 | 1 |
| CITA 35                  | Teruel   | Almond        | Guara     | 2009 | Orchard | 58 | 7 |
| CITA 36                  | Teruel   | Almond        | Guara     | 2009 | Orchard | 26 | 1 |
| CITA 68                  | Teruel   | Almond        | Guara     | 2010 | Orchard | 99 | 1 |
| CITA 138                 | Teruel   | Almond        |           | 2012 | Orchard | 37 | 1 |
| CITA 172                 | Teruel   | Almond        | Guara     | 2013 | Orchard | 15 | 1 |
| CITA 174                 | Teruel   | Flat peach    |           | 2013 | Orchard | 97 | 1 |
| CITA 175                 | Teruel   | Flat peach    |           | 2013 | Orchard | 98 | 1 |
| IVIA 2826.1              | Valencia | Japanese plum | Anna Gold | 2003 | Nursery | 29 | 1 |
| IVIA 2826.2 <sup>b</sup> | Valencia | Japanese plum | Anna Gold | 2003 | Nursery | 28 | 1 |
| IVIA 2826.3              | Valencia | Japanese plum | Anna Gold | 2003 | Nursery | 28 | 1 |
| IVIA 2826.4              | Valencia | Japanese plum | Anna Gold | 2003 | Nursery | 30 | 1 |
| IVIA 2826.5              | Valencia | Japanese plum | Anna Gold | 2003 | Nursery | 29 | 1 |
| IVIA 2826.6              | Valencia | Japanese plum | Anna Gold | 2003 | Nursery | 30 | 1 |

|              |          |               |           |      |         |    |   |
|--------------|----------|---------------|-----------|------|---------|----|---|
| IVIA 2826.7  | Valencia | Japanese plum | Anna Gold | 2003 | Nursery | 30 | 1 |
| IVIA 2826.8  | Valencia | Peach         | Zephir    | 2003 | Nursery | 79 | 1 |
| IVIA 2826.9  | Valencia | Peach         | Zephir    | 2003 | Nursery | 86 | 1 |
| IVIA 2826.10 | Valencia | Peach         | Zephir    | 2003 | Nursery | 30 | 1 |
| IVIA 2826.11 | Valencia | Peach         | Zephir    | 2003 | Nursery | 30 | 1 |
| IVIA 2832.4b | Valencia | Peach         | Plamaguel | 2003 | Nursery | 29 | 1 |
| IVIA 2832.5  | Valencia | Peach         | Plamaguel | 2003 | Nursery | 29 | 1 |
| IVIA 2832.7  | Valencia | Japanese plum | Angeleno  | 2003 | Nursery | 27 | 1 |
| IVIA 2832.10 | Valencia | Japanese plum | Angeleno  | 2003 | Nursery | 27 | 1 |
| IVIA 2832.17 | Valencia | Japanese plum | Larry Ann | 2003 | Nursery | 28 | 1 |
| IVIA 2832.19 | Valencia | Japanese plum | Larry Ann | 2003 | Nursery | 28 | 1 |
| IVIA 2832.20 | Valencia | Peach         | Zephir    | 2003 | Nursery | 80 | 1 |
| IVIA 2832.21 | Valencia | Peach         | Zephir    | 2003 | Nursery | 28 | 1 |
| IVIA 2832.22 | Valencia | Japanese plum | Anna Gold | 2003 | Nursery | 29 | 1 |
| IVIA 2832.24 | Valencia | Japanese plum | Anna Gold | 2003 | Nursery | 29 | 1 |
| IVIA 2832.25 | Valencia | Peach         | 58CC70    | 2003 | Nursery | 29 | 1 |
| IVIA 2832.26 | Valencia | Peach         | 58CC70    | 2003 | Nursery | 29 | 1 |

|                           |          |                       |           |      |         |     |   |
|---------------------------|----------|-----------------------|-----------|------|---------|-----|---|
| IVIA 2832.27              | Valencia | Peach                 | 58CC70    | 2003 | Nursery | 29  | 1 |
| IVIA 2832.30a             | Valencia | Peach x Chinese peach | Cadaman®  | 2003 | Nursery | 29  | 1 |
| IVIA 2832.30b             | Valencia | Peach x Chinese peach | Cadaman®  | 2003 | Nursery | 29  | 1 |
| IVIA 2835.4 <sup>c</sup>  | Valencia | Peach                 | Zephir    | 2003 | Nursery | 28  | 1 |
| IVIA 2835.5               | Valencia | Peach                 | Zephir    | 2003 | Nursery | 28  | 1 |
| IVIA 2835.6               | Valencia | Peach                 | Zephir    | 2003 | Nursery | 90  | 1 |
| IVIA 2835.7               | Valencia | Japanese plum         | Anna Gold | 2003 | Nursery | 29  | 1 |
| IVIA 2835.8               | Valencia | Japanese plum         | Anna Gold | 2003 | Nursery | 83  | 1 |
| IVIA 2835.9               | Valencia | Japanese plum         | Anna Gold | 2003 | Nursery | 30  | 1 |
| IVIA 3467.1               | Zaragoza | Peach                 |           | 2008 | Orchard | 109 | 2 |
| IVIA 3467.2               | Zaragoza | Peach                 |           | 2008 | Orchard | 67  | 1 |
| IVIA 3724.3               | Zaragoza | Peach x Chinese peach | Barrier   | 2009 | Nursery | 103 | 8 |
| IVIA 3767.1 <sup>d</sup>  | Zaragoza | Almond x peach        | Garnem    | 2010 | Nursery | 104 | 8 |
| IVIA 3767.2 <sup>d</sup>  | Zaragoza | Almond x peach        | Garnem    | 2010 | Nursery | 101 | 8 |
| IVIA 3767.3 <sup>d</sup>  | Zaragoza | Peach x Chinese peach | Cadaman®  | 2010 | Nursery | 38  | 8 |
| IVIA 3767.4 <sup>cd</sup> | Zaragoza | Peach x Chinese peach | Cadaman®  | 2010 | Nursery | 38  | 8 |
| CITA 4                    | Zaragoza | Peach                 | Catherine | 2004 | Nursery | 17  | 1 |

|         |          |                |             |      |                   |    |   |
|---------|----------|----------------|-------------|------|-------------------|----|---|
| CITA 5  | Zaragoza | Peach          | Catherine   | 2004 | Nursery           | 17 | 1 |
| CITA 6  | Zaragoza | Peach          | Catherine   | 2004 | Nursery           | 91 | 1 |
| CITA 7  | Zaragoza | Peach          |             | 2004 | Nursery           | 95 | 1 |
| CITA 8  | Zaragoza | Peach          |             | 2004 | Nursery           | 29 | 1 |
| CITA 12 | Zaragoza | Peach          | Honey Royal | 2008 | Nursery           | 32 | 1 |
| CITA 13 | Zaragoza | Peach          | Gardeta     | 2008 | Nursery           | 84 | 1 |
| CITA 15 | Zaragoza | Peach          | Ryan Sun    | 2008 | Nursery           | 32 | 1 |
| CITA 19 | Zaragoza | Peach          |             | 2008 | Nursery           | 23 | 1 |
| CITA 22 | Zaragoza | Peach          |             | 2008 | Experimental plot | 23 | 1 |
| CITA 23 | Zaragoza | Peach          | Evaisa      | 2008 | Experimental plot | 29 | 1 |
| CITA 24 | Zaragoza | Almond         | Ayles       | 2008 | Experimental plot | 29 | 1 |
| CITA 25 | Zaragoza | Almond         |             | 2008 | Experimental plot | 23 | 1 |
| CITA 26 | Zaragoza | Almond x peach | Monegro     | 2008 | Experimental plot | 39 | 2 |
| CITA 29 | Zaragoza | Peach          |             | 2008 | Experimental plot | 29 | 1 |
| CITA 37 | Zaragoza | Almond         | Guara       | 2009 | Orchard           | 63 | 7 |
| CITA 39 | Zaragoza | Almond         | Guara       | 2009 | Orchard           | 60 | 7 |
| CITA 40 | Zaragoza | Almond         | Guara       | 2009 | Orchard           | 74 | 1 |

|          |          |                |           |      |                   |     |    |
|----------|----------|----------------|-----------|------|-------------------|-----|----|
| CITA 43  | Zaragoza | Almond         | Guara     | 2009 | Orchard           | 94  | 1  |
| CITA 47  | Zaragoza | Apricot        | Cristali  | 2009 | Experimental plot | 77  | 1  |
| CITA 48  | Zaragoza | Japanese plum  | El Dorado | 2009 | Experimental plot | 89  | 1  |
| CITA 54  | Zaragoza | Almond         |           | 2010 | Experimental plot | 39  | 2  |
| CITA 59  | Zaragoza | Almond         |           | 2010 | Orchard           | 39  | 2  |
| CITA 64  | Zaragoza | Almond         |           | 2010 | Experimental plot | 106 | 2  |
| CITA 69  | Zaragoza | Peach          |           | 2010 | Experimental plot | 24  | 1  |
| CITA 75  | Zaragoza | Almond         |           | 2010 | Experimental plot | 33  | 1  |
| CITA 76  | Zaragoza | Almond         | Guara     | 2010 | Orchard           | 42  | 17 |
| CITA 87  | Zaragoza | Almond         |           | 2010 | Experimental plot | 33  | 1  |
| CITA 89  | Zaragoza | Almond         | Guara     | 2010 | Orchard           | 55  | 7  |
| CITA 114 | Zaragoza | Almond         |           | 2011 | Experimental plot | 33  | 1  |
| CITA 118 | Zaragoza | Almond         |           | 2011 | Nursery           | 75  | 1  |
| CITA 121 | Zaragoza | Peach x almond |           | 2011 | Experimental plot | 24  | 1  |
| CITA 123 | Zaragoza | Almond         | Guara     | 2011 | Orchard           | 76  | 1  |
| CITA 153 | Zaragoza | Almond x peach | Garnem    | 2012 | Experimental plot | 24  | 1  |
| CITA 154 | Zaragoza | Almond         |           | 2012 | Orchard           | 39  | 2  |

|               |         |               |  |  |  |   |    |
|---------------|---------|---------------|--|--|--|---|----|
| IVIA 3397.1-1 | Unknown | Japanese plum |  |  |  | 8 | 15 |
| IVIA 3397.1-2 | Unknown | Japanese plum |  |  |  | 8 | 15 |
| IVIA 3397.2   | Unknown | Japanese plum |  |  |  | 8 | 15 |

<sup>a</sup> IVIA, Instituto Valenciano de Investigaciones Agrarias, Moncada, Valencia, Spain; CITA, Centro de Investigación y Tecnología Agroalimentaria de Aragón, Montañana, Zaragoza, Spain.

<sup>b</sup> Strains deposited in the Collection Française de Bactéries Phytopathogènes (CFBP), INRA, Angers, France.

<sup>c</sup> Strains included in the panel test for preliminary primers screening.

<sup>d</sup> Interception by the Centro de Sanidad y Certificación Vegetal del Gobierno de Aragón (CSCV), Spain, of Garnem and Cadaman® rootstocks plants from an Italian nursery.
