# Supplementary material for: Multilocus Variable Number of Tandem Repeat Analysis Reveals Multiple Introductions in Spain of Xanthomonas arboricola pv. pruni, the Causal Agent of Bacterial Spot Disease of Stone Fruits and Almond
Source: PubMed Central journal article supplement (PMC5036818; doi:10.1371/journal.pone.0163729), 2016-09-26
Supplement: pone.0163729.s003.pdf [file pone.0163729.s003.pdf]

**S2 Table. *X. arboricola* pv. *pruni* strains from international collections.**

| <b>Strain<sup>a</sup></b>     | <b>Country of origin</b> | <b>Host of isolation</b> | <b>Year of isolation</b> | <b>Haplotype</b> |
|-------------------------------|--------------------------|--------------------------|--------------------------|------------------|
| <b>CFBP 5229<sup>b</sup></b>  | Argentina                | <i>Prunus</i> spp.       | 1996                     | W3               |
| <b>CFBP 5529<sup>b</sup></b>  | Australia                | Peach                    | 1964                     | W15              |
| <b>DAR 33337</b>              | Australia                | Japanese plum            | 1978                     | W18              |
| <b>DAR 33420</b>              | Australia                | Peach                    | 1980                     | W17              |
| <b>DAR 41285</b>              | Australia                | Peach                    | 1982                     | W1               |
| <b>DAR 41286</b>              | Australia                | Peach                    | 1982                     | W1               |
| <b>DAR 41287</b>              | Australia                | Peach                    | 1982                     | W11              |
| <b>DAR 56679</b>              | Australia                | Apricot                  | 1987                     | W2               |
| <b>DAR 56680</b>              | Australia                | Japanese plum            | 1987                     | W2               |
| <b>DAR 61729</b>              | Australia                | European plum            | 1988                     | W16              |
| <b>DAR 69849</b>              | Australia                | Peach x almond           | 1994                     | W13              |
| <b>CFBP 5722<sup>b</sup></b>  | Brazil                   | Peach                    | 1991                     | W9               |
| <b>CFBP 1311<sup>b</sup></b>  | Canada                   |                          |                          | W7               |
| <b>CFBP 5562<sup>b</sup></b>  | France                   | Peach                    | 1995                     | W14              |
| <b>CFBP 5530<sup>b</sup></b>  | Italy                    | Peach                    | 1989                     | W21              |
| <b>ISF 43</b>                 | Italy                    | Japanese plum            | 1993                     | W22              |
| <b>ISF 463</b>                | Italy                    | Peach                    | 1996                     | W10              |
| <b>ISF 464</b>                | Italy                    | Peach                    | 1996                     | W6               |
| <b>ISF 465</b>                | Italy                    | Peach                    | 1996                     | W12              |
| <b>ISF 515</b>                | Italy                    | Peach                    | 1997                     | W19              |
| <b>ISPaVe B4</b>              | Italy                    | Japanese plum            |                          | W4               |
| <b>CFBP 3894<sup>bc</sup></b> | New Zealand              | Japanese plum            | 1953                     | W20              |
| <b>CFBP 411</b>               | USA                      |                          | 1963                     | W8               |
| <b>CFBP 5720<sup>b</sup></b>  | USA                      | Peach                    | 1987                     | W23              |
| <b>CFBP 5724<sup>b</sup></b>  | USA                      | Almond                   |                          | W5               |

<sup>a</sup> CFBP: Collection Française de Bactéries Phytopathogènes, INRA, Angers, France;

DAR: Australian Collection of Plant Pathogenic Bacteria, Rydalmere, Australia; ISF:

Culture Collection of C.R.A.: Centro di Ricerca per la Frutticoltura, Roma, Italia;

ISPaVe: Istituto di Patologia Vegetale, Bologna, Italia.

<sup>b</sup> Strains included in the panel test.

<sup>c</sup> Pathotype strain.
